# Supplementary material for: Reduced antibody cross-reactivity following infection with B.1.1.7 than with parental SARS-CoV-2 strains
Source: eLife journal article supplement (doi:10.7554/elife.69317), 2021-07-29
Supplement: supp [file elife-69317-supp-v1.zip]

Archive with 14 entries (14 files):
- elife_poa_e69317_Figure_1_figure_supplement_1.tif
- elife_poa_e69317_Figure_1_figure_supplement_2.tif
- elife_poa_e69317_Figure_1_figure_supplement_3.tif
- elife_poa_e69317_Figure_1_figure_supplement_4.tif
- elife_poa_e69317_Figure_1_figure_supplement_5.tif
- elife_poa_e69317_Figure_1_figure_supplement_6.tif
- elife_poa_e69317_Figure_2_figure_supplement_1.tif
- elife_poa_e69317_Figure_2_figure_supplement_2.tif
- elife_poa_e69317_Figure_2_figure_supplement_3.tif
- elife_poa_e69317_Figure_2_figure_supplement_4.tif
- elife_poa_e69317_Figure_2_figure_supplement_5.tif
- elife_poa_e69317_Source_data_1.xlsx
- elife_poa_e69317_Supplementary_file_1.docx
- elife_poa_e69317_Transparent_Reporting_File.pdf
