# Supplementary material for: Reduced antibody cross-reactivity following infection with B.1.1.7 than with parental SARS-CoV-2 strains
Source: eLife journal article supplement (doi:10.7554/elife.69317), 2021-07-29
Supplement: supp [file elife-69317-supp-v1.zip › elife_poa_e69317_Source_data_1.xlsx]

## Sheet: Sheet1
	flow cytometry signal, % of maximal																neutralisation, IC50
	Wuhan spike				D614G spike				B.1.1.7 spike				B.1.351 spike				Wuhan	B.1.1.7	B.1.351
Group	IgG	IgA	IgM		IgG	IgA	IgM		IgG	IgA	IgM		IgG	IgA	IgM
D614G COVID-19	45.063	68.5549	33.0373		34.2098	47.9288	27.5344		39.464	89.3917	33.1746		46.2367	100	38.6372		2560	1780.91	76.4101
D614G COVID-20	100	46.0158	18.3311		86.223	39.6438	42.6454		95.7633	27.959	15.8408		100	70.6231	27.2791		1454.25	560.863	203.717
D614G COVID-21	66.9454	35.544	14.8345		69.1123	56.6783	42.1773		81.5893	38.2741	26.5397		98.2633	52.4138	38.8299		2560	1049.31	272.244
D614G COVID-22	88.7396	51.7702	16.5762		67.83	38.1727	21.6445		80.9586	29.3331	20.1485		97.4064	52.801	29.7039		2560	1943.51	290.881
D614G COVID-23	78.9232	21.9906	14.6071		56.1939	21.3318	32.9914		82.2493	26.6215	10.1124		64.0978	25.0575	41.5648		1341.76	367.303	145.352
D614G COVID-24	86.9666	11.1898	12.5204		51.8776	9.67867	14.0461		69.7227	10.2235	13.6279		68.5224	9.93345	7.98402		756.571	633.155	40
D614G COVID-25	88.6929	20.8736	23.5212		100	28.3391	38.3157		76.6393	16.5812	30.5694		61.8441	23.4483	9.26222		710.115	321.126	41.1094
D614G COVID-26	95.2276	17.413	23.6603		99.294	26.9841	49.3037		74.1351	15.3353	20.9065		85.1238	23.3394	30.9821		2560	666.181	225.323
D614G COVID-27	77.6609	11.479	21.2981		48.8837	14.5567	20.5211		72.7007	8.90436	19.6115		78.3199	12.4017	39.4173		1663.42	1103.72	212.637
D614G COVID-28	55.8019	43.9015	16.0411		47.1587	46.7286	33.2059		28.6406	41.9934	37.1396		41.6493	37.2777	19.5677		482.822	491.757	100.908
D614G COVID-29	92.8306	21.2227	13.6387		92.2223	29.3457	30.5067		100	26.7864	13.586		99.8058	28.3969	14.7368		2560	1525.62	350.945
D614G COVID-30	2.64876	46.9034	15.292		3.73621	50.4065	14.9393		2.90877	45.6028	22.5824		2.77929	44.6461	20.3195		253.507	240.197	124.576
D614G COVID-31	73.0755	15.6478	9.60432		88.28	22.3384	29.6095		80.8069	14.8956	9.90668		53.4577	19.6733	11.3863		828.871	581.284	57.3352
D614G COVID-32	83.6219	13.3639	34.6531		71.3888	14.8664	19.7839		75.5323	10.9747	28.3679		82.236	18.5118	35.6391		2560	1562.96	466.551
D614G COVID-33	79.8151	21.3324	40.9053		70.221	28.8424	51.4335		63.1973	22.9022	42.3843		74.5723	49.1833	54.3609		2560	2292.35	448.1
D614G COVID-34	62.7592	9.98305	14.8987		44.5025	13.2017	15.2436		63.3463	10.3518	17.1663		86.235	19.6733	24.234		2560	1525.62	358.345
D614G COVID-35	73.5214	31.485	11.9987		59.4474	24.0418	14.4713		61.3104	37.0099	25.7513		83.41	67.9734	15.484		1089.06	955.144	104.959
D614G COVID-36	47.3503	100	19.7919		32.0211	88.3856	21.7615		30.28	100	41.6873		38.8157	44.5977	25.6485		995.325	609.002	71.8855
D614G COVID-37	52.8942	32.3128	100		55.6062	42.47	86.5624		44.5604	21.2166	100		57.7709	33.6479	100		2187.92	1084.97	306.625
D614G COVID-38	62.4445	21.0831	54.0277		71.4842	32.7139	100		55.0484	15.7933	47.4538		55.5343	21.2946	51.4145		1341.76	456.596	134.964
D614G Mild/Asymptomatic 1 month	22.9595	24.6534	11.6161		20.7362	33.859	22.4441		15.5179	23.5617	17.6081		15.7417	20.5687	6.51786		145.861	138.264	40
D614G Mild/Asymptomatic 1 month	2.31249	2.41348	2.11081		11.6265	14.8489	25.6933		5.96125	6.28435	5.60274		1.82524	1.4882	1.32989		40	40	40
D614G Mild/Asymptomatic 1 month	30.1074	7.20056	22.2291		27.1477	10.5125	23.8874		24.1377	9.56394	21.314		17.2127	4.99698	14.9765		213.034	127.498	40
D614G Mild/Asymptomatic 1 month	20.9527	6.06363	17.2557		25.3979	14.1919	48.4456		11.7602	5.56981	15.8332		19.6378	9.00181	18.7171		267.172	83.056	40
D614G Mild/Asymptomatic 1 month	20.7405	11.3992	4.50788		48.9524	23.4341	8.65156		14.2298	12.5687	50.1733		24.0138	14.8215	4.90132		83.6292	258.685	40
D614G Mild/Asymptomatic 1 month	31.9919	8.90595	6.22542		42.5944	13.7538	9.5643		32.6991	7.73177	9.03828		23.0569	16.1525	6.62124		152.934	158.908	40
D614G Mild/Asymptomatic 1 month	1.69391	0.744989	0.684877		6.01076	6.13228	2.18824		2.0412	1.86882	1.8625		2.62504	1.71809	2.06297		40	40	40
D614G Mild/Asymptomatic 1 month	23.2058	10.1426	19.9015		27.3423	14.0604	18.1417		12.3536	37.1381	27.7014		19.2265	66.703	10.2679		399.44	361.072	39.2124
D614G Mild/Asymptomatic 1 month	26.3275	14.3911	5.80005		36.4214	24.9671	8.2693		29.423	27.2994	16.1607		30.4065	27.7435	8.03571		178.968	184.105	40
D614G Mild/Asymptomatic 1 month	42.9447	15.1491	32.5236		39.9706	31.9755	78.9718		31.27	15.1337	39.0402		25.1107	7.22323	16.9314		381.854	285.263	40
D614G Mild/Asymptomatic 1 month	6.28293	1.32642	2.14559		17.7136	9.85545	7.45407		5.54609	2.85819	5.83889		5.76138	1.73019	2.37782		40	40	40
D614G Mild/Asymptomatic 1 month	6.52389	2.4434	1.33497		14.1072	7.92816	4.04494		4.95263	3.2063	3.01276		7.18101	3.21839	2.30263		40	40	40
D614G Mild/Asymptomatic 1 month	21.9039	52.0993	1.28414		47.9964	28.6903	3.88891		16.5398	18.1935	3.2032		16.9728	25.8681	1.8468		98.8841	40	40
D614G Mild/Asymptomatic 1 month	24.5257	9.36472	3.12207		29.2333	13.2282	13.8862		15.7734	13.0817	4.74576		20.8089	4.16213	2.12406		69.2696	40	40
D614G Mild/Asymptomatic 1 month	22.1269	19.9661	1.86468		41.2758	46.4739	6.77146		14.637	21.6746	4.60103		16.6557	14.6642	2.90883		100.024	40	40
D614G Mild/Asymptomatic 1 month	28.5519	6.88142	36.1139		52.9367	38.283	82.0377		14.2245	5.07512	33.6888		29.5153	6.71506	24.9483		225.496	241.104	46.068
D614G Mild/Asymptomatic 1 month	26.8922	17.393	2.55224		36.1218	23.9159	7.19273		21.4392	18.8714	3.13464		18.9066	17.314	2.84774		92.0619	63.2349	40
D614G Mild/Asymptomatic 3 months	54.6453	7.76008	6.62436		17.8886	7.27863	7.07874		59.0996	6.05389	5.84253		26.4074	4.98983	2.12446		168.535	139.168	40
D614G Mild/Asymptomatic 3 months	2.02831	1.69851	0.973106		2.4976	6.53686	6.63314		3.41237	1.93798	1.34339		2.73304	1.07305	0.482314		40	40	40
D614G Mild/Asymptomatic 3 months	37.0455	3.56688	33.471		25.935	6.30505	30.2693		30.3535	4.24511	37.6186		42.7954	2.31816	17.437		287.068	453.354	40
D614G Mild/Asymptomatic 3 months	34.6465	4.42675	13.4893		26.4574	6.62958	18.8936		32.276	2.95312	7.468		14.174	2.22744	5.73992		173.595	40	40
D614G Mild/Asymptomatic 3 months	36.1677	7.9724	2.36782		37.5523	9.64302	4.39239		41.2261	4.66962	12.0306		29.5265	9.55733	1.68392		83.228	168.555	40
D614G Mild/Asymptomatic 3 months	49.5688	9.38429	5.30205		34.0359	9.41122	5.4873		75.0828	10.2621	6.7346		33.3998	13.7807	2.24599		133.001	117.417	40
D614G Mild/Asymptomatic 3 months	5.05733	0.875796	0.483359		2.89264	4.91423	1.55962		5.6232	1.34367	0.588837		2.96313	1.47662	0.242296		40	40	40
D614G Mild/Asymptomatic 3 months	25.2252	5.36093	35.0105		9.6993	6.7223	9.68235		29.0292	19.8413	37.1143		25.0908	175.082	4.0765		315.812	155.049	40
D614G Mild/Asymptomatic 3 months	28.8535	8.15287	2.75323		29.3266	9.64302	3.8322		81.1812	15.1901	4.40393		19.1594	8.0244	1.52442		134.028	103.69	40
D614G Mild/Asymptomatic 3 months	63.9667	8.52442	26.6763		38.1111	9.96755	43.2618		68.0017	9.92986	22.6967		30.9454	5.17754	9.73515		390.449	295.836	42.3383
D614G Mild/Asymptomatic 3 months	7.53702	1.21019	3.2153		8.77667	6.35141	5.34089		12.2717	2.43632	6.06819		6.00552	1.39528	1.63075		40	40	40
D614G Mild/Asymptomatic 3 months	15.2027	1.92144	1.42666		16.2383	7.09318	6.00929		20.4155	2.89775	1.95339		14.7492	0.866573	0.634983		40	40	40
D614G Mild/Asymptomatic 3 months	32.8371	28.5456	4.89321		20.1471	10.1066	2.92826		50.9025	10.0775	2.78904		29.0791	10.8087	1.61556		67.386	40	40
D614G Mild/Asymptomatic 3 months	44.4462	4.27813	1.28612		21.8	6.7223	6.4358		69.0697	8.4533	1.56906		23.9019	1.52354	0.546876		122.224	70.1849	40
D614G Mild/Asymptomatic 3 months	27.9258	10.5945	1.56506		22.6499	10.663	3.14469		33.061	16.1314	2.75378		20.2459	5.58423	1.49403		39.7478	40	40
D614G Mild/Asymptomatic 3 months	31.4619	2.17622	10.4018		61.1144	9.64302	25.5268		59.7832	2.97158	13.9628		47.6914	2.00845	3.55241		139.977	87.255	40
D614G Mild/Asymptomatic 3 months	27.2708	5.70064	1.3862		27.4995	11.4975	3.80037		38.0594	4.83573	1.58316		21.128	6.49148	0.637262		61.4212	40	40
B.1.1.7 Mild/Asymptomatic	17.6003	8.62572	7.72691		14.7917	5.8176	12.6024		15.0977	24.2212	15.3209		21.9645	17.1691	8.06718		40	40	40
B.1.1.7 Mild/Asymptomatic	4.27786	2.29587	5.83001		5.09108	1.71763	9.69608		3.07708	6.40496	13.0855		5.53348	9.69856	5.23128		40	40	40
B.1.1.7 Mild/Asymptomatic	57.4785	10.9346	12.1025		70.2688	9.27413	17.5376		72.6095	20.6453	39.1602		67.8217	12.713	19.3282		107.46	319.519	40
B.1.1.7 Mild/Asymptomatic	25.841	5.12355	16.4438		19.9542	7.57777	18.1272		29.4201	26.3509	24.9811		26.3059	20.3932	14.3227		162.231	196.573	40
B.1.1.7 Mild/Asymptomatic	55.3432	8.48304	28.3092		43.6577	8.2744	29.1796		74.9854	23.665	41.2752		36.6191	22.9358	13.8216		91.3348	371.577	40
B.1.1.7 Mild/Asymptomatic	25.4443	8.23659	7.37979		20.1916	6.41319	11.6419		31.9648	36.0935	35.1297		21.608	92.0839	10.8756		44.1482	172.656	44.4417
B.1.1.7 Mild/Asymptomatic	15.5527	5.27272	26.8669		13.6459	8.88062	44.9457		15.7024	46.583	142.462		10.7281	29.6461	140.336		40	426.127	40
B.1.1.7 Mild/Asymptomatic	8.18276	14.774	3.96979		11.0473	22.0367	7.82772		11.1816	29.5455	4.73554		8.84072	17.2739	2.41189		40	40	40
B.1.1.7 Mild/Asymptomatic	70.6122	6.51145	2.92112		69.8919	7.92874	4.59754		75.2662	122.123	3.01946		99.1352	39.6592	2.85242		239.506	1392.55	142.309
B.1.1.7 Mild/Asymptomatic	63.9807	35.5665	26.3927		76.9357	32.8742	31.3995		77.9591	71.5671	37.3547		83.5924	79.4758	30.446		330.871	927.401	261.761
B.1.1.7 Mild/Asymptomatic	93.3848	6.68656	26.3512		99.0651	8.79022	36.116		115.356	23.9034	37.9221		81.2317	13.1848	13.8877		340.616	1084.97	163.533
B.1.1.7 Mild/Asymptomatic	45.6627	8.70355	50.2066		32.7881	8.9657	50.9051		47.5535	20.2161	87.224		27.1707	11.5072	30.7159		192.899	363.125	75.2264
B.1.1.7 Mild/Asymptomatic	31.104	8.80732	17.0574		19.0708	11.0183	20.563		28.4242	48.7921	23.0999		21.1114	13.7877	7.21366		118.065	426.127	40
B.1.1.7 Mild/Asymptomatic	11.8559	7.18594	6.47046		10.3515	5.45068	5.87633		14.9237	65.5594	20.6066		15.5954	16.5924	4.0859		40	40	40
B.1.1.7 Mild/Asymptomatic	18.5468	24.3725	78.2664		11.6351	18.6706	94.9596		16.2107	25.747	78.1209		17.0621	78.4535	30.7654		157.089	224.966	40
B.1.1.7 Mild/Asymptomatic	38.3403	15.7209	22.1125		38.927	11.9862	25.2408		45.6101	70.6294	27.6842		30.5072	31.2451	13.9372		122.224	314.794	50.8965
B.1.1.7 Mild/Asymptomatic	1.06984	4.61119	14.0923		0.929877	4.78596	13.3525		2.431	21.5671	12.3392		0	0	0		40	40	40
B.1.1.7 Mild/Asymptomatic	1.80535	4.14424	1.37867		3.03372	5.17416	3.32152		3.432	10.6643	10.6988		2.30805	19.3447	12.9901		40	40	134.964
B.1.1.7 Mild/Asymptomatic	1.31798	6.23257	2.94556		1.93614	13.406	4.29584		2.02612	34.4088	6.54791		0	0	0		58.5203	40	40
B.1.1.7 Mild/Asymptomatic	0.607727	0.601206	0.630668		1.29353	0.595586	1.18191		1.92619	1.36364	1.58883		0	0	0		40	40	40
B.1.1.7 Mild/Asymptomatic	2.70728	25.5659	2.71823		1.97433	8.9657	2.4607		3.16495	18.3249	4.74586		3.58186	32.6343	2.84141		40	40	40
B.1.1.7 Mild/Asymptomatic	0.893016	0.535703	0.701557		1.21548	0.46477	0.786094		1.29044	1.60521	1.37561		0	0	0		40	40	40
B.1.1.7 Mild/Asymptomatic	2.40565	5.26623	23.3054		1.45958	6.47168	22.0964		1.95031	21.3922	23.4404		1.63024	8.57143	6.89427		92.5531	139.472	40
B.1.1.7 Mild/Asymptomatic	7.89302	3.0417	16.0796		4.01342	1.80271	19.7409		7.40498	10.7915	24.2107		6.17039	6.23853	13.7996		40	40	40
B.1.1.7 Mild/Asymptomatic	11.0817	6.6217	6.69779		9.80522	4.48285	6.94198		14.2294	14.4946	18.7324		13.2465	8.70249	5.42952		40	40	40
B.1.1.7 Mild/Asymptomatic	34.1783	7.84098	33.8385		27.6638	6.03031	34.613		42.6846	17.4666	40.3295		50.6194	14.443	23.7885		496.645	1103.72	119.328
B.1.1.7 Mild/Asymptomatic	31.8158	3.51514	10.8509		22.249	2.51529	16.1454		30.6227	11.8245	37.4819		28.0764	6.99869	3.47467		44.7172	291.78	40
B.1.1.7 Mild/Asymptomatic	38.1426	9.96174	31.4014		39.5214	9.8644	38.0591		44.5384	21.4558	70.9471		32.0498	14.5216	14.1465		302.064	560.863	62.7316
B.1.1.7 Mild/Asymptomatic	62.0758	18.4772	46.7354		68.7113	18.5961	57.9025		61.2591	30.4037	51.2793		62.0545	42.3591	22.7203		756.571	1562.96	86.9667
