# Supplementary material for: Reduced antibody cross-reactivity following infection with B.1.1.7 than with parental SARS-CoV-2 strains
Source: eLife journal article supplement (doi:10.7554/elife.69317), 2021-07-29
Supplement: supp [file elife-69317-supp-v1.zip › elife_poa_e69317_Supplementary_file_1.docx]

**Table S1. Donor and patient characteristics.**

| **Donor/patient group** | **Number** | **Age, years (range)** | **Male gender (%)** | **Days post infection2, median (range)** |
| --- | --- | --- | --- | --- |
| Acute D614G infection, mild/asymptomatic1 | 17 | 32  (26-66) | 7  (41) | 28  (6-35) |
| Acute D614G infection, COVID-19 patients | 20 | 61  (25-73) | 14  (70) | 25  (14-43) |
| Acute B.1.1.7 infection, mild/asymptomatic | 29 | 57  (20-99) | 18  (62) | 11  (4-46) |

1Seroconversion and/or first positive RT-qPCR in the first month of enrolment (month 1). The same group of participants were samples again 2 months later (month 3).

2Days post symptom onset for symptomatic cases and days post first positive RT-qPCR test for asymptomatic cases.
