# Supplementary figures and images for: Reduced antibody cross-reactivity following infection with B.1.1.7 than with parental SARS-CoV-2 strains
Source: eLife journal article supplement (doi:10.7554/elife.69317), 2021-07-29

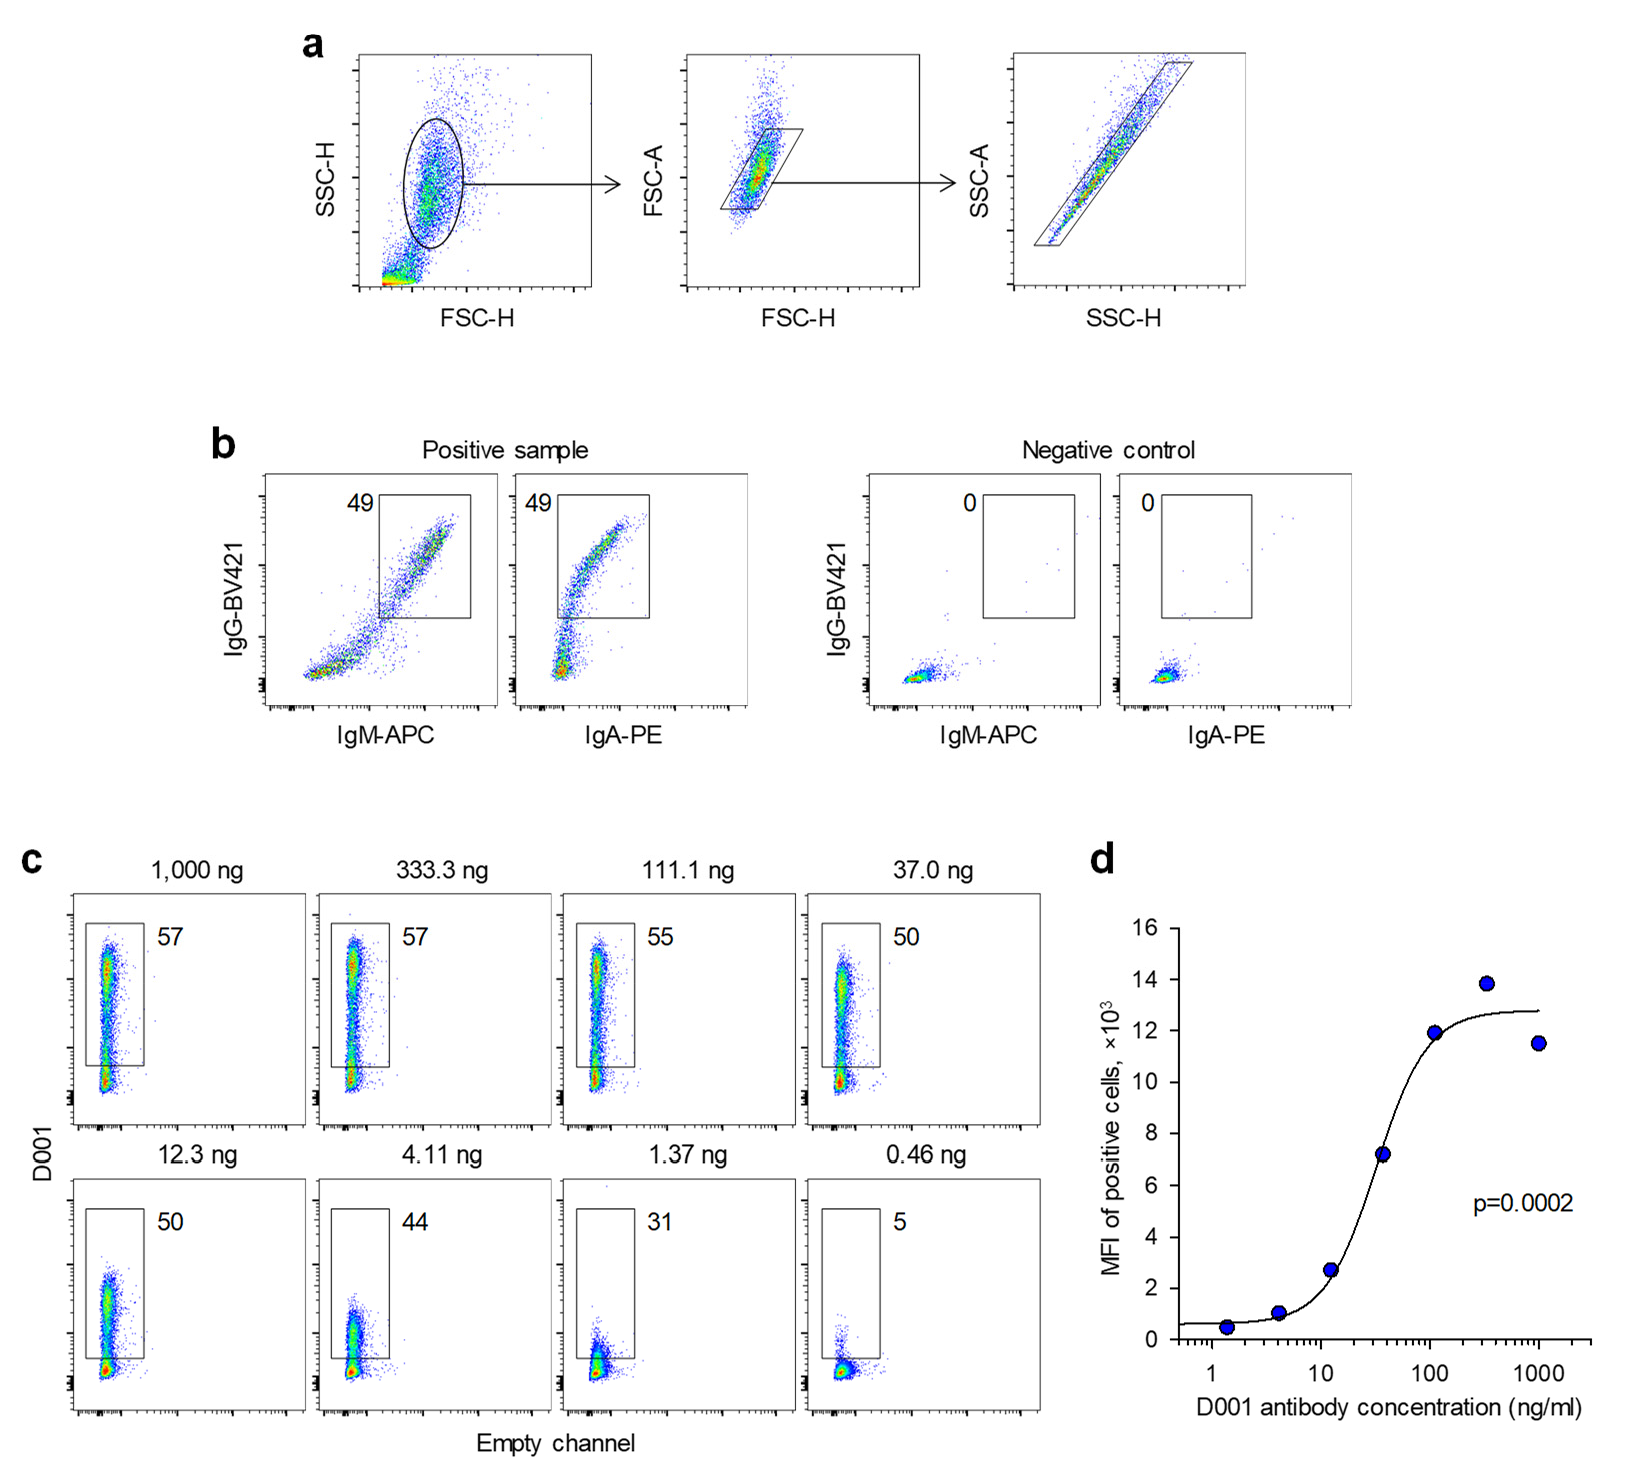

Supplement: supp [file elife-69317-supp-v1.zip › elife_poa_e69317_Figure_1_figure_supplement_1.tif]

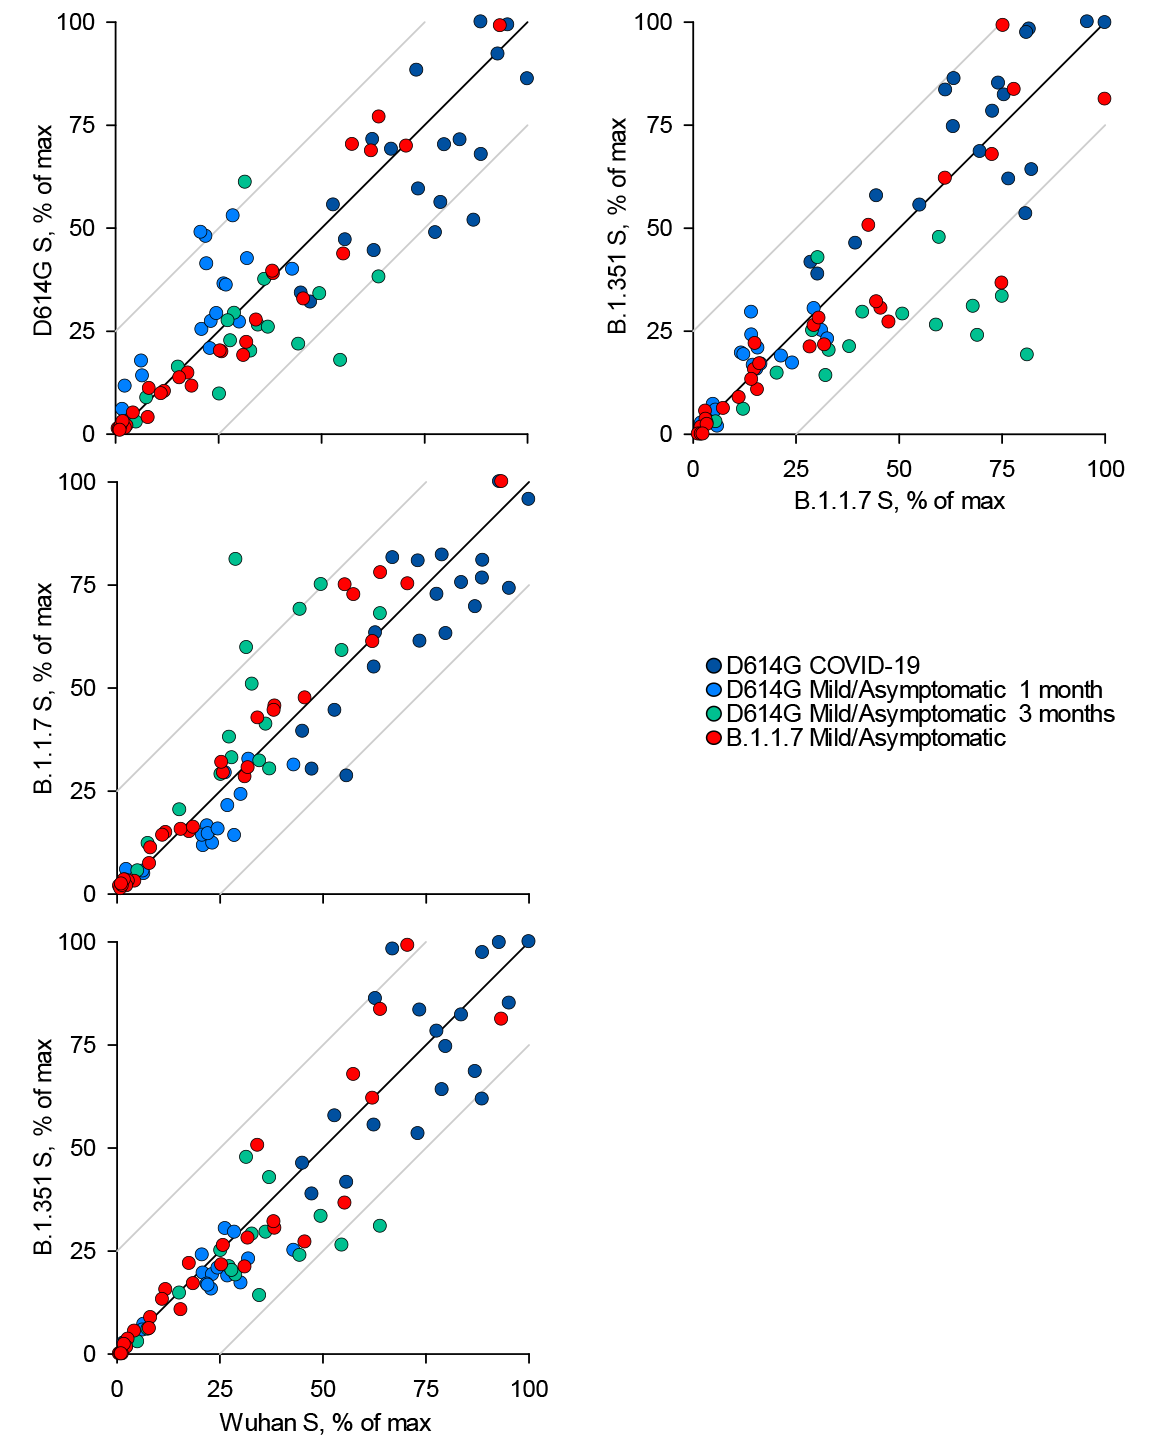

Supplement: supp [file elife-69317-supp-v1.zip › elife_poa_e69317_Figure_1_figure_supplement_2.tif]

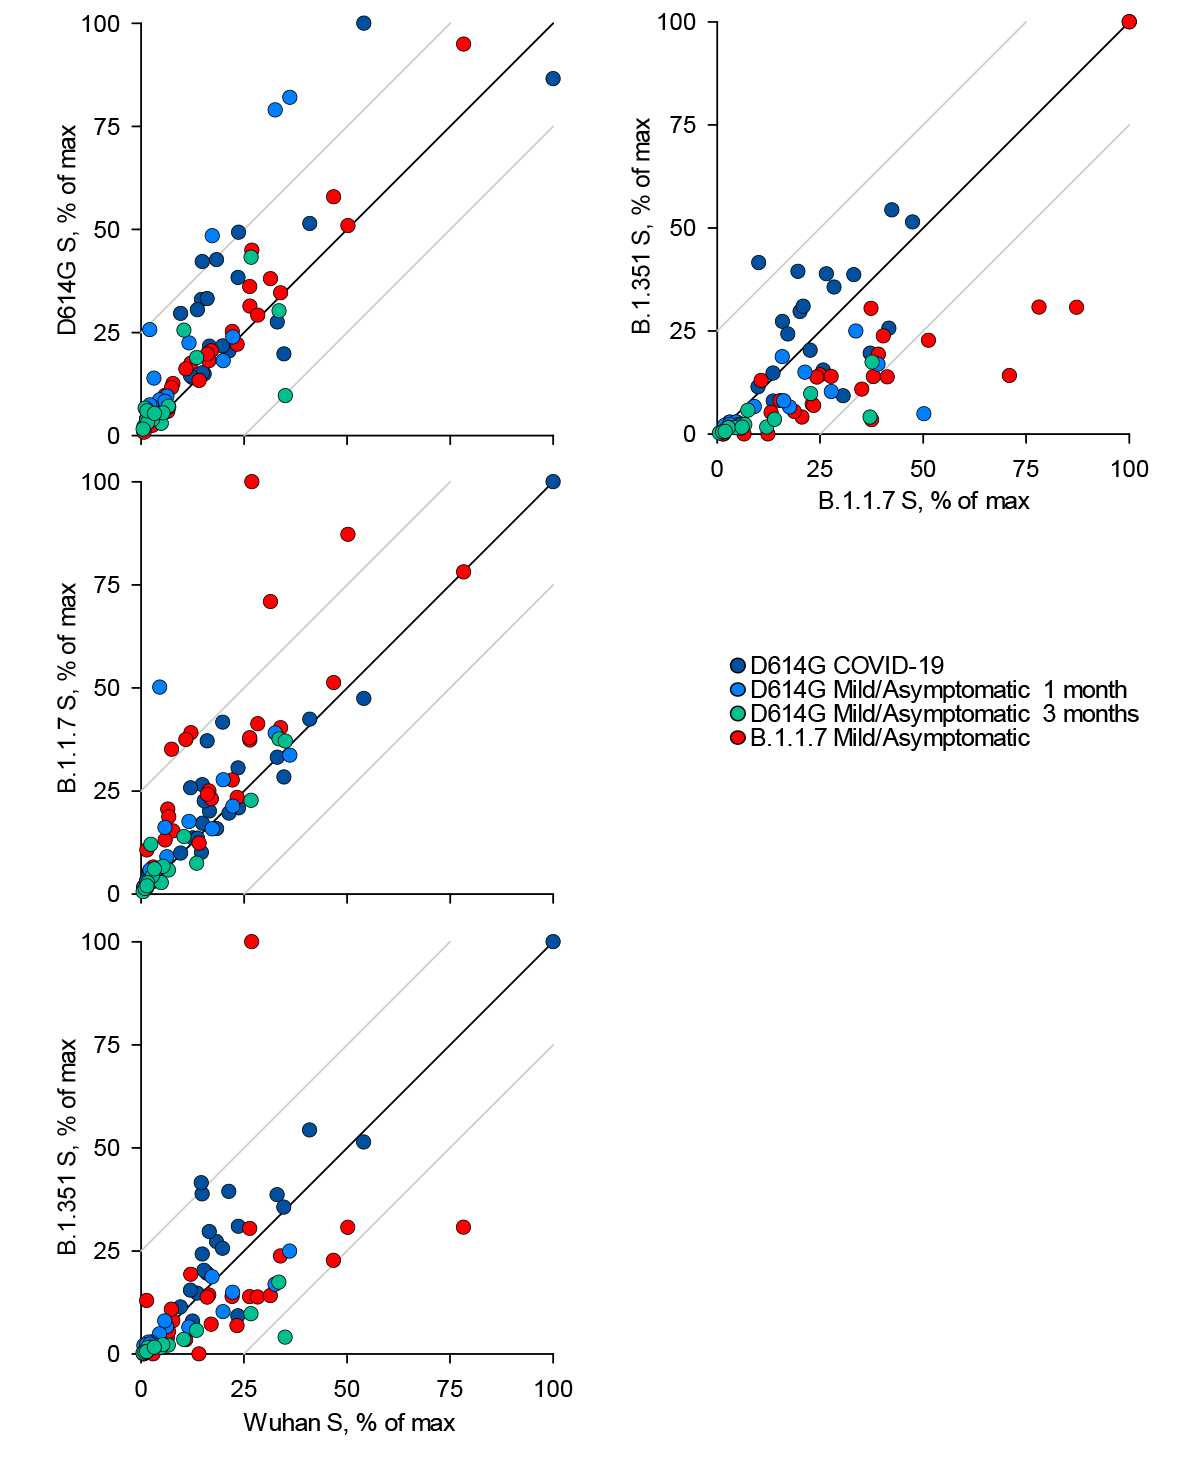

Supplement: supp [file elife-69317-supp-v1.zip › elife_poa_e69317_Figure_1_figure_supplement_3.tif]

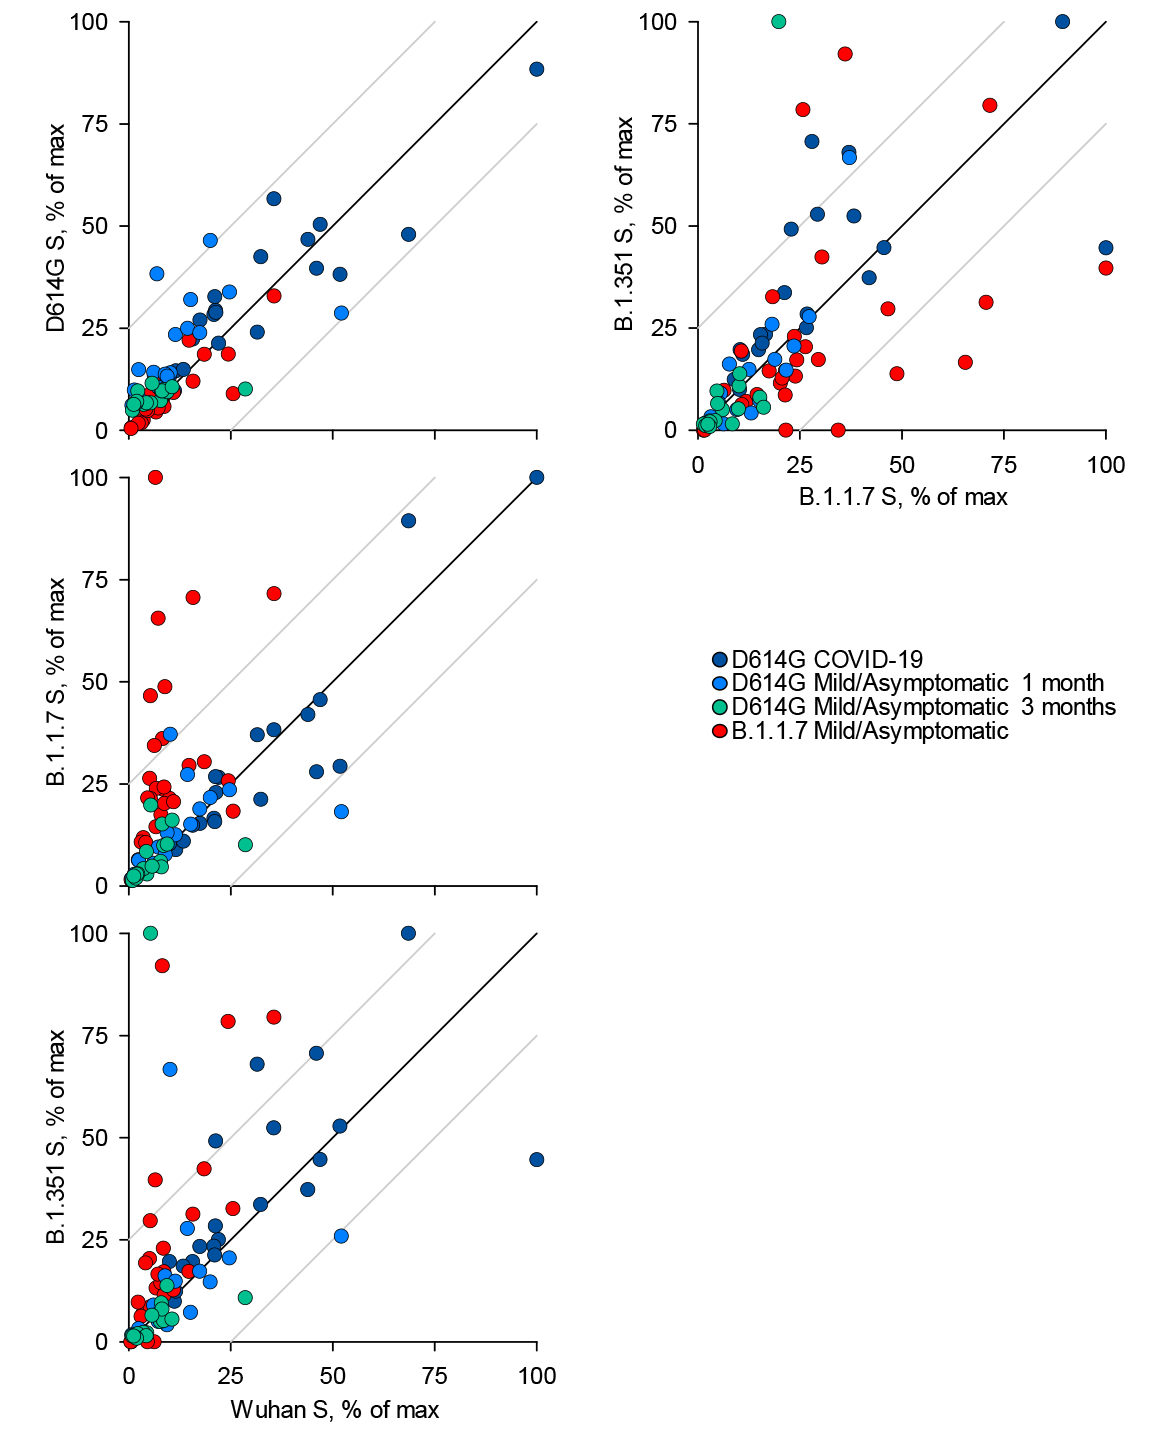

Supplement: supp [file elife-69317-supp-v1.zip › elife_poa_e69317_Figure_1_figure_supplement_4.tif]

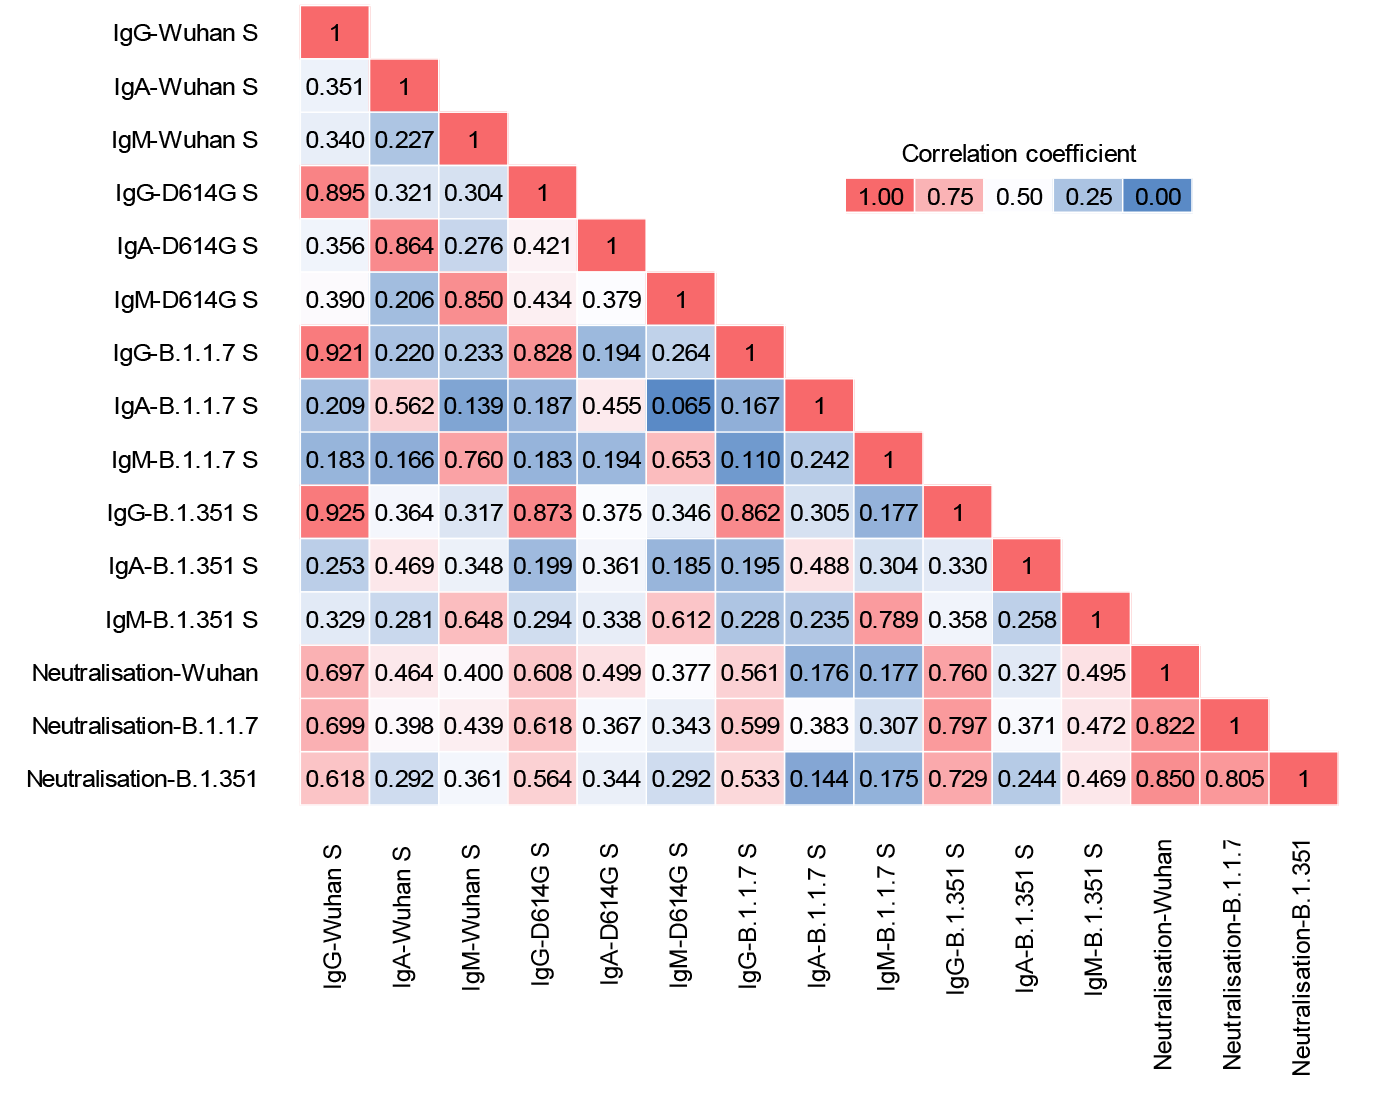

Supplement: supp [file elife-69317-supp-v1.zip › elife_poa_e69317_Figure_1_figure_supplement_5.tif]

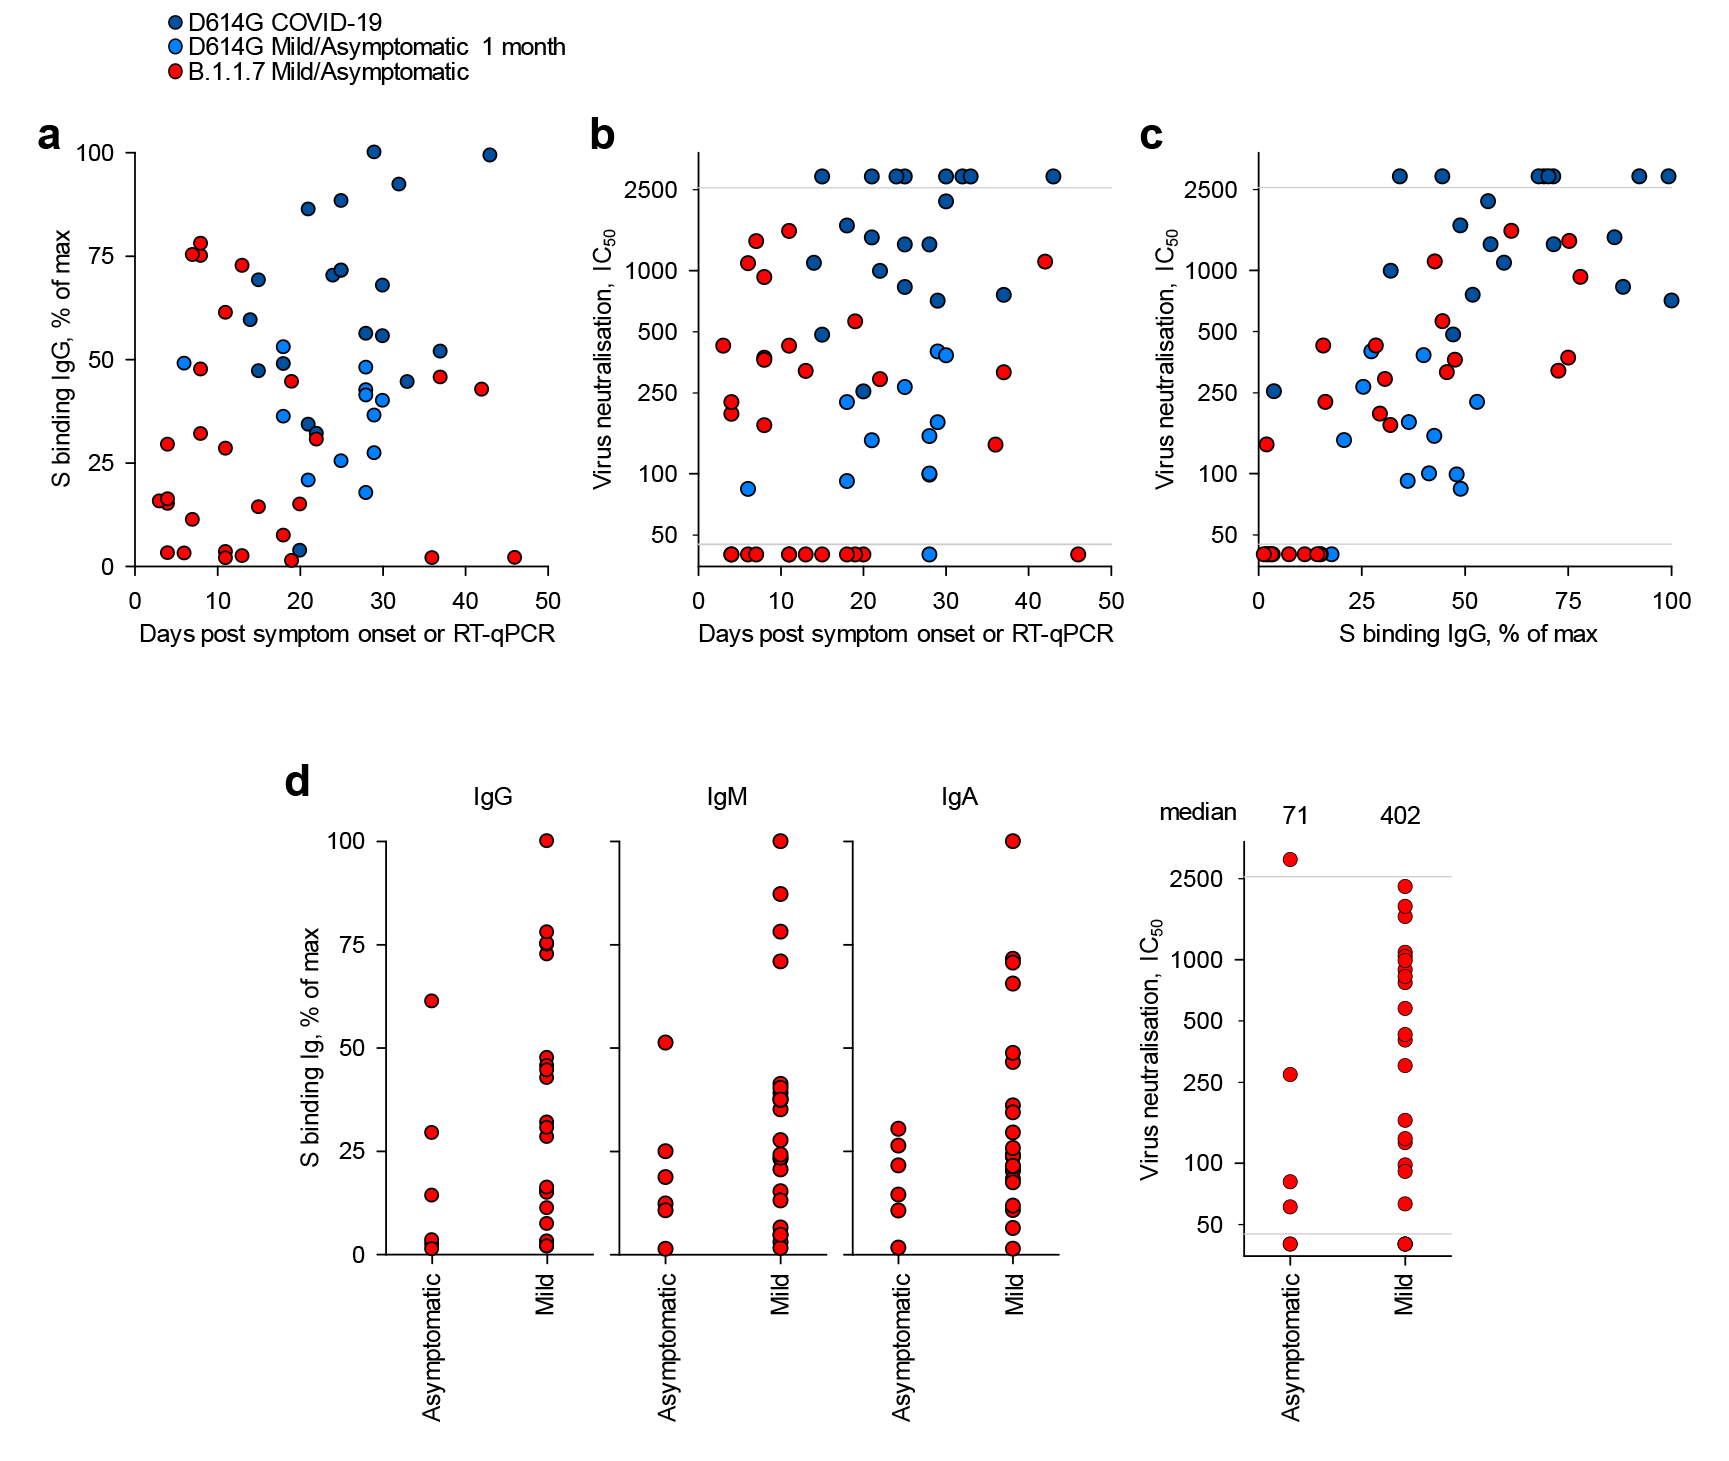

Supplement: supp [file elife-69317-supp-v1.zip › elife_poa_e69317_Figure_1_figure_supplement_6.tif]

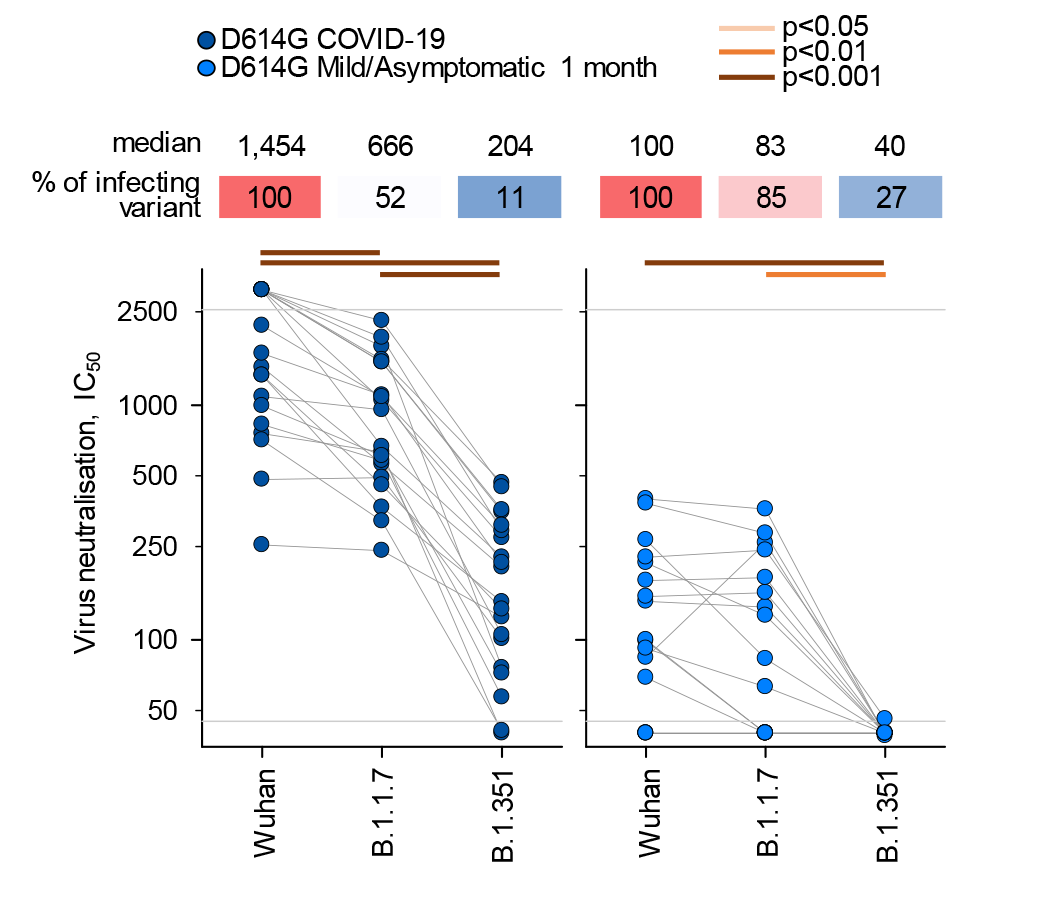

Supplement: supp [file elife-69317-supp-v1.zip › elife_poa_e69317_Figure_2_figure_supplement_1.tif]

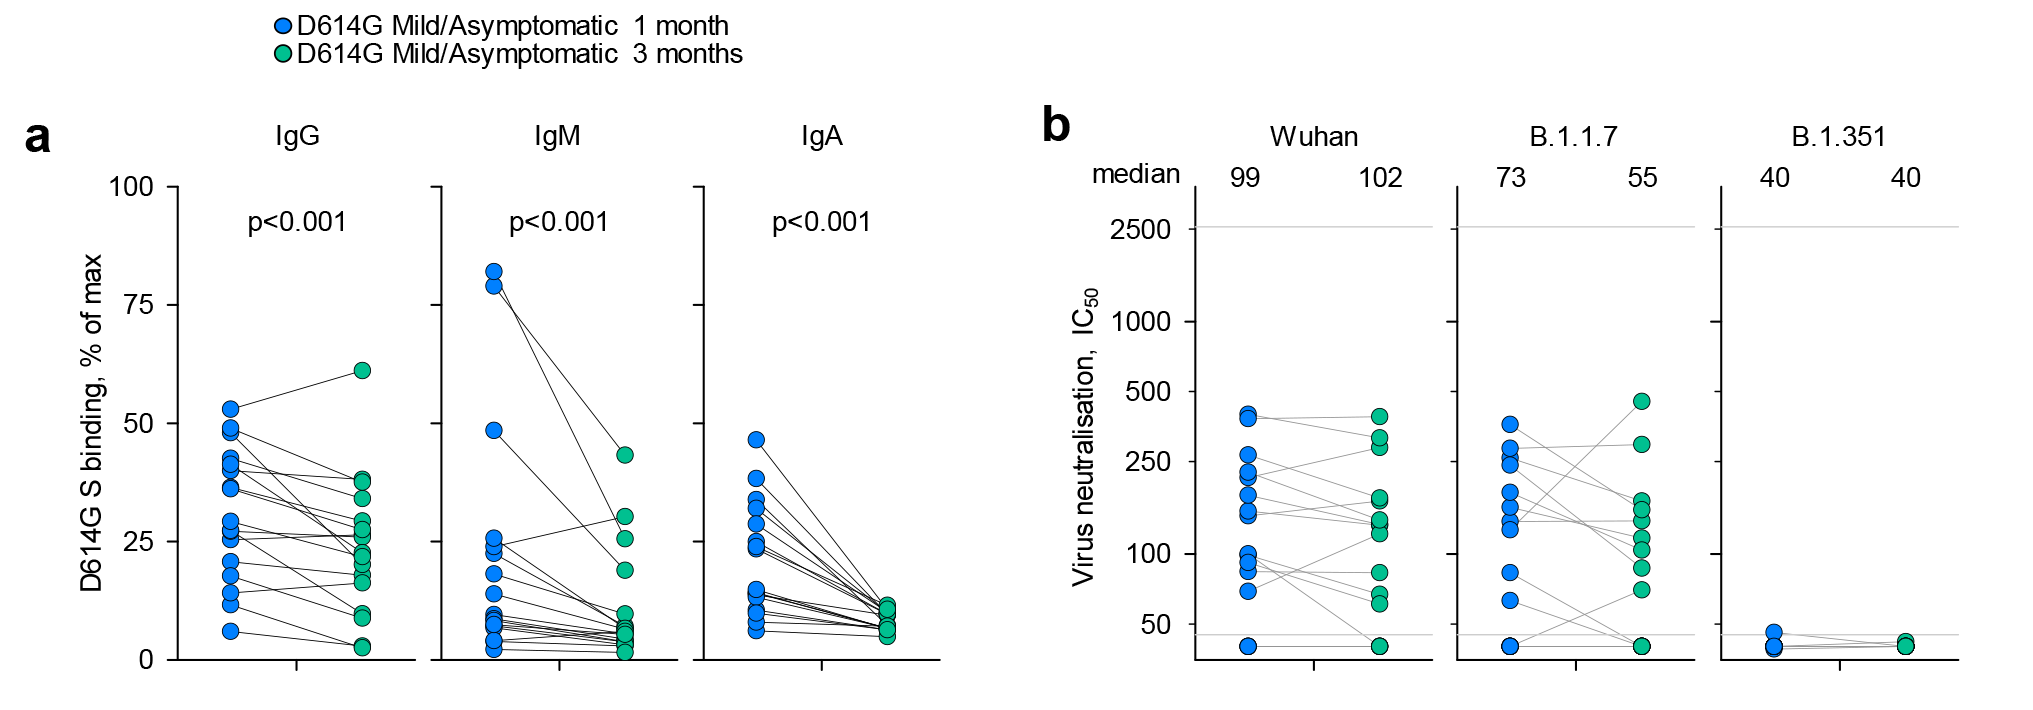

Supplement: supp [file elife-69317-supp-v1.zip › elife_poa_e69317_Figure_2_figure_supplement_2.tif]

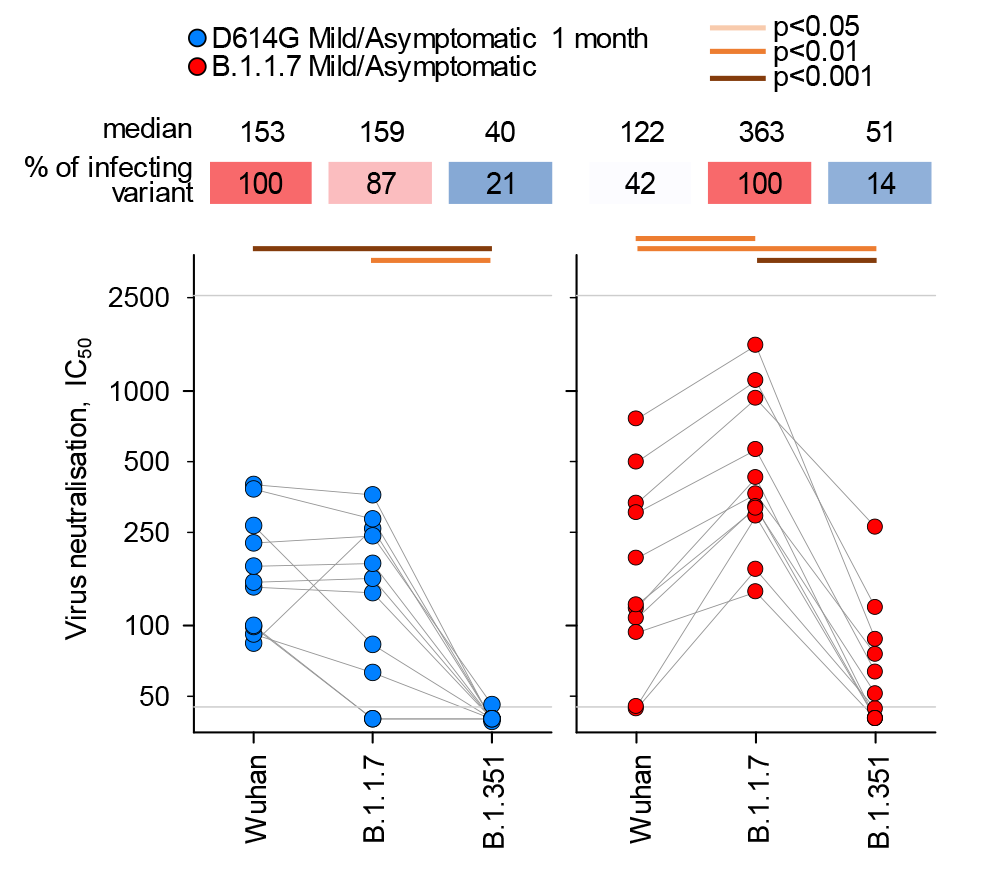

Supplement: supp [file elife-69317-supp-v1.zip › elife_poa_e69317_Figure_2_figure_supplement_3.tif]

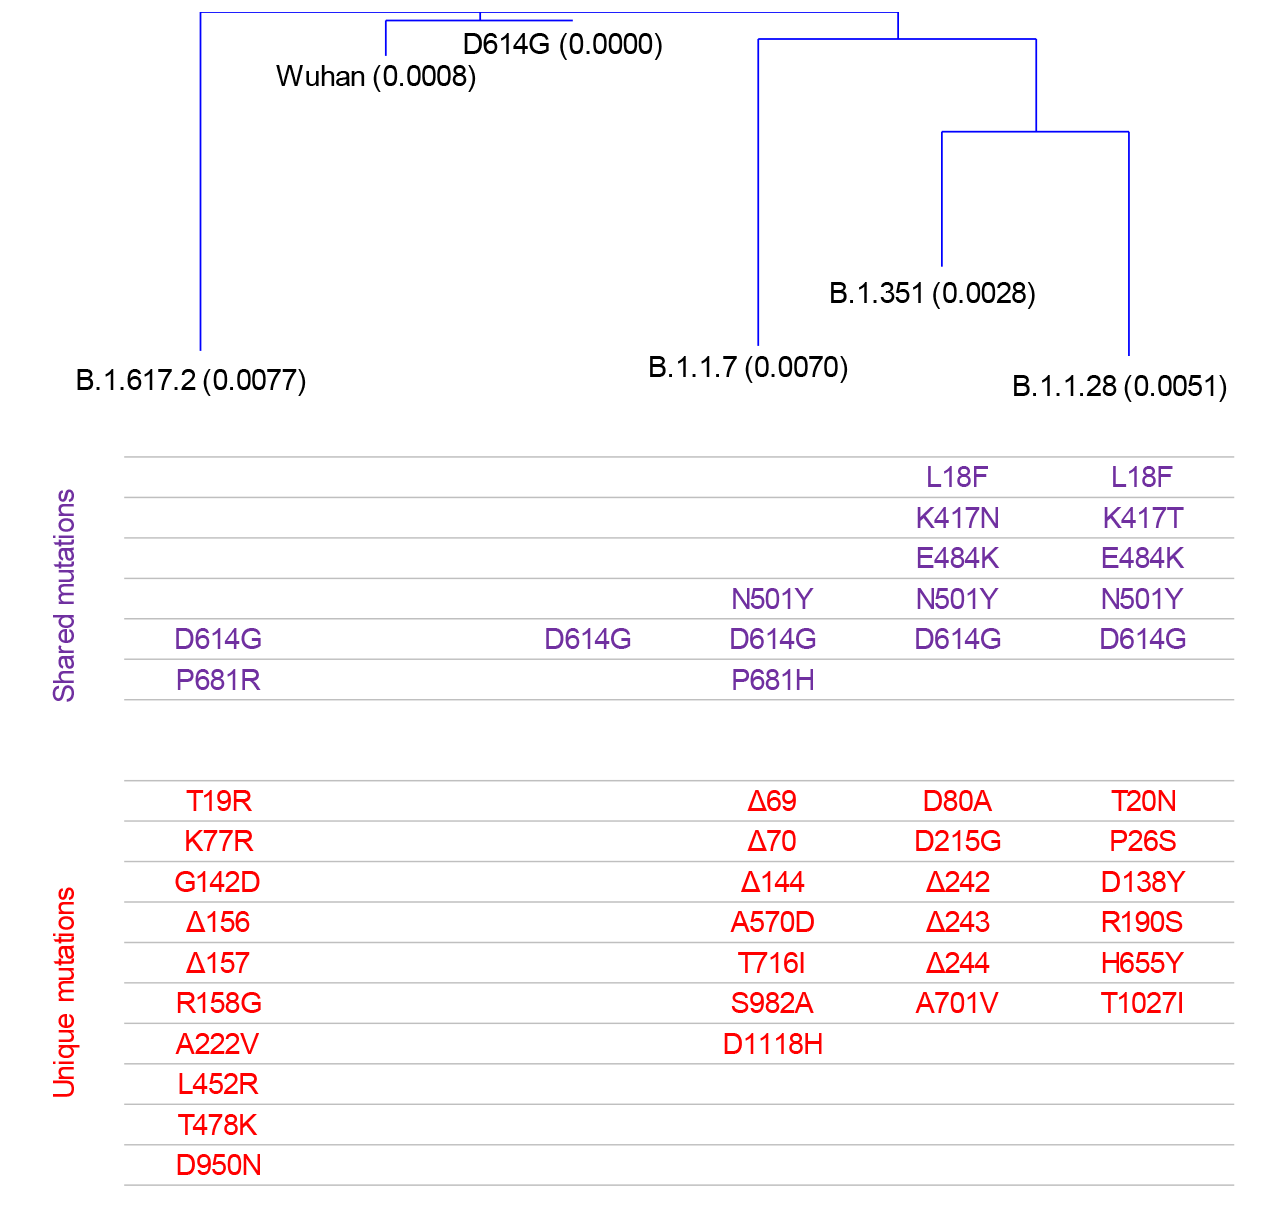

Supplement: supp [file elife-69317-supp-v1.zip › elife_poa_e69317_Figure_2_figure_supplement_4.tif]

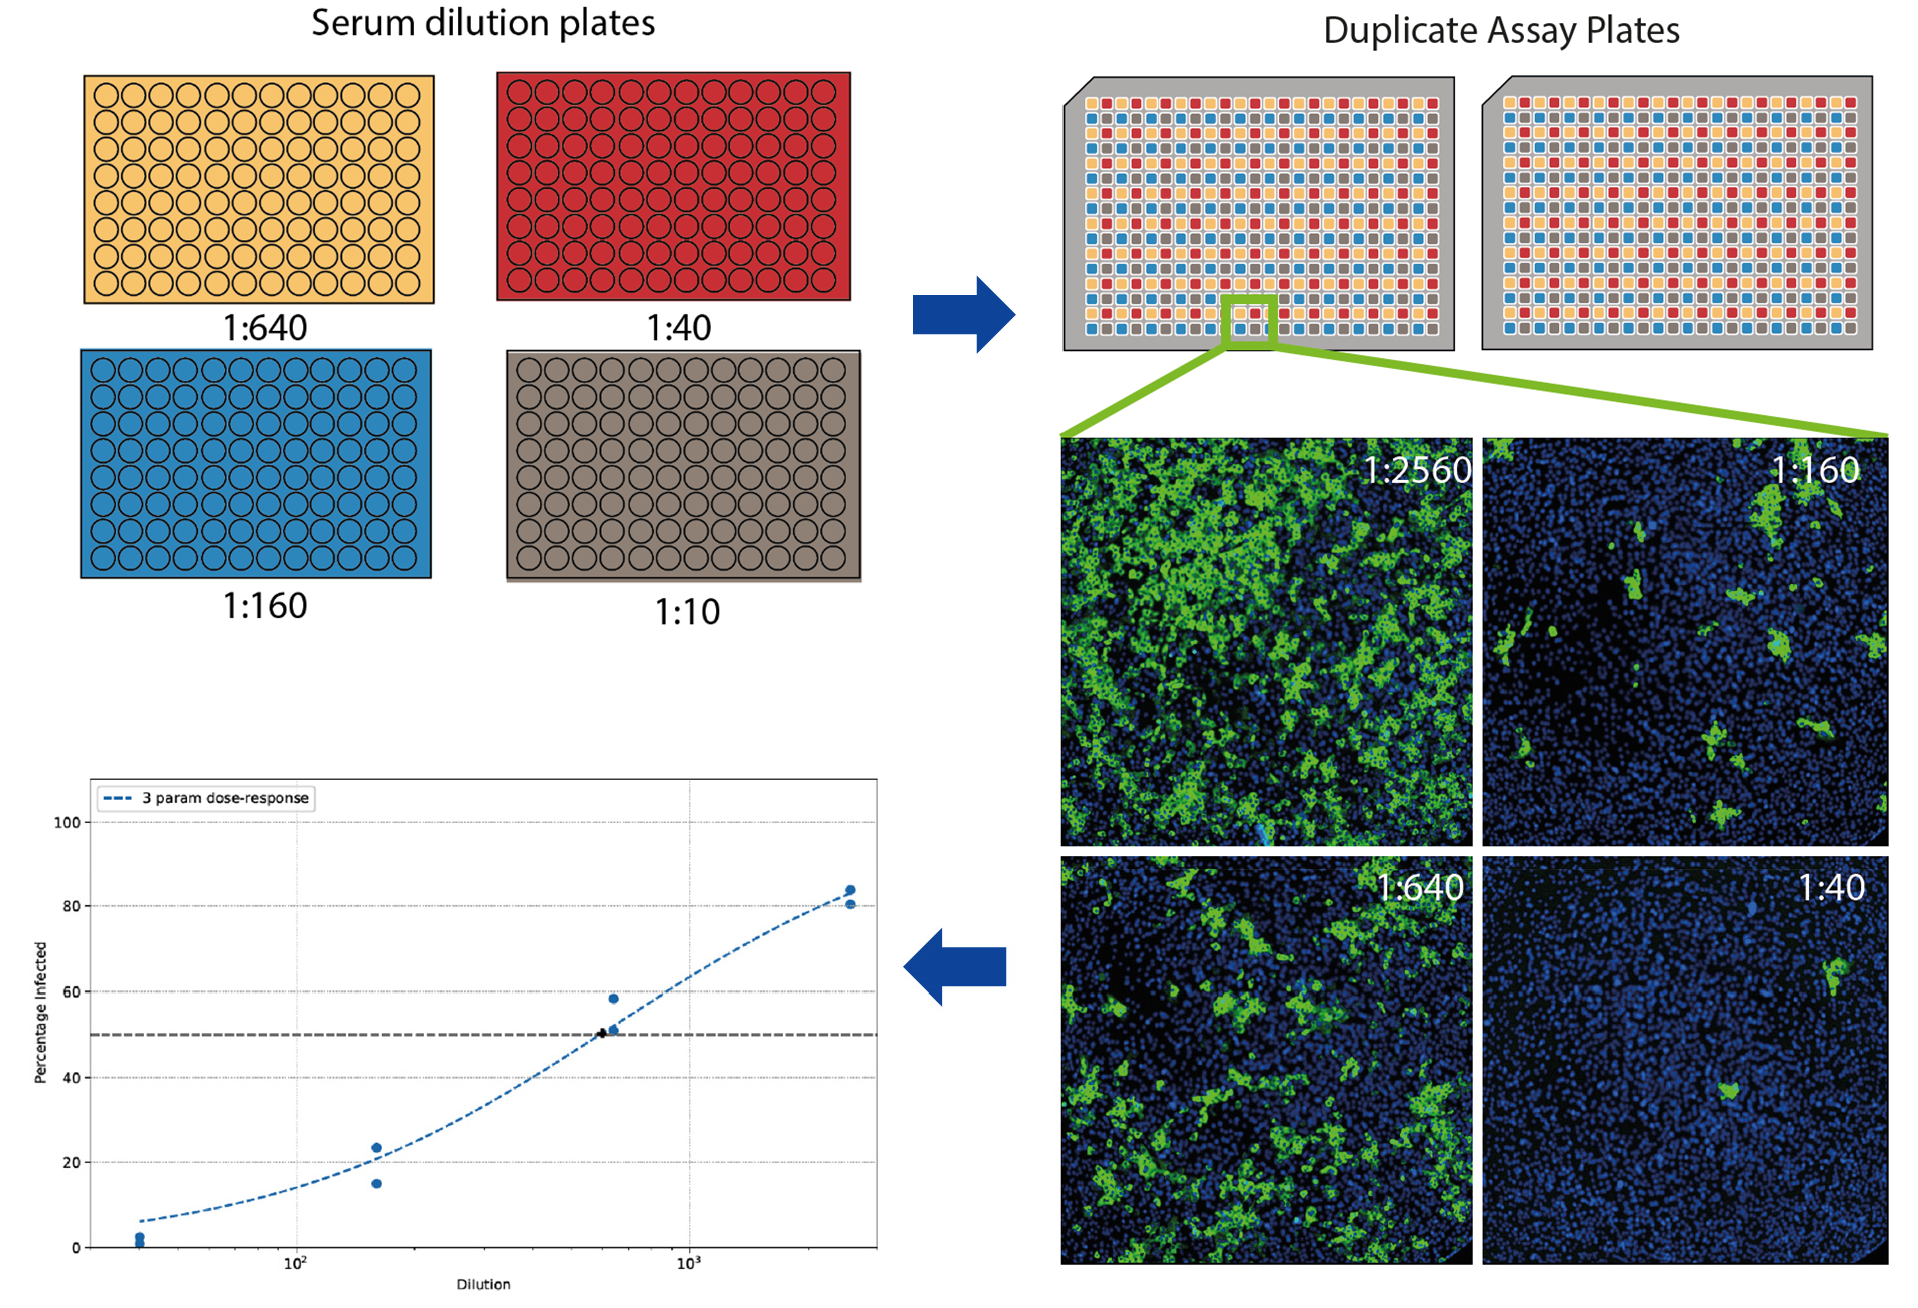

Supplement: supp [file elife-69317-supp-v1.zip › elife_poa_e69317_Figure_2_figure_supplement_5.tif]
